# Supplementary material for: Blue and red shift hydrogen bonds in crystalline cobaltocinium complexes
Source: Royal Society of Chemistry journal article supplement (doi:10.1039/c2nj20760e), 2012-01-01
Supplement: c2nj20760e.pdf [file c2nj20760e.pdf]

Table 1 SI  
 Frequency data and assignment of the vibrational modes of [Cp<sub>2</sub>Co][EL<sub>6</sub>] complexes, according to Ref. 11

|                 |       | (1) [Cp <sub>2</sub> Co][PF <sub>6</sub> ] |                  | (2) [Cp <sub>2</sub> Co][AsF <sub>6</sub> ] |                | (3) [Cp <sub>2</sub> Co][SbF <sub>6</sub> ] |                | (6) [Cp <sub>2</sub> Co] <sub>3</sub> [Co(CN) <sub>6</sub> ] <sup>b</sup> |         |
|-----------------|-------|--------------------------------------------|------------------|---------------------------------------------|----------------|---------------------------------------------|----------------|---------------------------------------------------------------------------|---------|
|                 |       | Ir                                         | Raman            | Ir                                          | Raman          | Ir                                          | Raman          | Ir                                                                        | Raman   |
| A <sub>1g</sub> | v(CH) |                                            | 3135 m           |                                             | 3131 m         |                                             | 3129m          |                                                                           | 3135 m  |
| A <sub>2u</sub> | v(CH) | 3129 m                                     |                  | 3127 m                                      |                | 3124 m                                      |                | 3132 m                                                                    |         |
| E <sub>1u</sub> | v(CH) | 3129 m                                     |                  | 3119 mw                                     |                | 3124 m                                      |                | 3122 m                                                                    |         |
| E <sub>1g</sub> | v(CH) |                                            | 3119 mw          |                                             | 3116 mw        |                                             | 3113 mw        |                                                                           | 3115 mw |
| E <sub>2g</sub> |       |                                            |                  |                                             |                |                                             |                |                                                                           | 3121 w  |
| E <sub>1g</sub> | v(CC) |                                            | 1421 m           |                                             | 1425, 1421 m   |                                             | 1424 sh, 1422m |                                                                           | 1419 m  |
| E <sub>1u</sub> | v(CC) | 1418 s                                     |                  | 1417ms                                      |                | 1417 s                                      |                | 1417 m                                                                    |         |
| E <sub>2g</sub> | v(CC) |                                            | 1362 w           |                                             | 1368 w         |                                             | 1369 w         |                                                                           |         |
| A <sub>2u</sub> | v(CC) | 1116 vw                                    |                  | 1115 vw                                     |                | 1115 w                                      |                |                                                                           |         |
| A <sub>1g</sub> | v(CC) |                                            | 1113 vs          |                                             | 1112 s         | 1111 w                                      | 1111s          |                                                                           | 1112 s  |
| E <sub>2g</sub> | δ(CH) |                                            | 1077 wsh, 1070 m | 1072 vw                                     | 1078 mw        | 1072 mw                                     | 1074 mw        |                                                                           | 1061 m  |
| E <sub>2u</sub> | δ(CH) | 1062 mw                                    |                  | 1059 vw                                     |                | 1059 w                                      |                |                                                                           |         |
| E <sub>1u</sub> | δ(CH) | 1012 m                                     |                  | 1014 mw                                     |                | 1014 ms                                     |                | 1008 m                                                                    |         |
| E <sub>1g</sub> | δ(CH) |                                            | 1010 w           |                                             | 1018 w, 1013 w |                                             | 1017w , 1012w  |                                                                           | 1008 w  |
| E <sub>2g</sub> | γ(CH) |                                            | 947 vw           | 945 vw                                      | 946 vw         | 945 w                                       | 947 vw         |                                                                           |         |

|          |                      |                        |              |                |        |                     |             |        |        |
|----------|----------------------|------------------------|--------------|----------------|--------|---------------------|-------------|--------|--------|
| $E_{1u}$ | $\gamma(\text{CH})$  | 909 m, 900 m           |              | 902 vw, 893 vw |        | 903 sh, 895 mw      |             | 897 mw |        |
| $A_{2u}$ | $\gamma(\text{CH})$  | 870 ms                 |              | 869 ms         |        | 869 s               |             | 863 s  |        |
| $E_{1g}$ | $\gamma(\text{CH})$  |                        | 857 w, 854 w |                | 858 w  |                     | 861sh, 857w |        |        |
| $A_{1g}$ | $\gamma(\text{CH})$  |                        | 851 w        |                | 849w   |                     | 849 w       |        | 854 w  |
| $E_{1u}$ | tilt<br>(CpCoCp)     | 505 w                  |              | 507 mw         |        | 507 ms              |             |        |        |
| $A_{2u}$ | $\nu$<br>(CpCoCp)    | 457 m                  |              | 464 ms         |        | 460 s               |             |        |        |
| $E_{1g}$ | tilt<br>(CpCoCp)     |                        | 393 m, 387 m |                | 393 m, |                     | 391m, 382mw |        | 388 ms |
| $A_{1g}$ | $\nu$<br>(CpCoCp)    |                        | 317 s        | 323            | 321 vs |                     | 319vs       |        | 317 s  |
| $A_{1g}$ | $\nu(\text{E-F})$    |                        | 741 m        |                | 681 mw |                     | 645mw       |        |        |
| $T_{1u}$ | $\nu(\text{E-F})$    | 833 vs vbr             |              | 700 s, 691 s   |        | 659, 653 vs         |             |        |        |
| $E_g$    | $\nu(\text{E-F})$    |                        | 573, 570 vw  |                | 580 mw |                     | 579vw, br   |        |        |
| $T_{1u}$ | $\delta(\text{E-F})$ | 557 s                  |              | 397 vs         |        | 176 sh<br>172 (ATR) |             |        |        |
| $T_{2g}$ | $\delta(\text{E-F})$ |                        | 470 w        |                | 382 m  | 276                 | 278mw       |        |        |
| ?        | ?                    | 375                    |              |                |        |                     |             |        |        |
| ?        | ?                    |                        | 288 vw       |                |        | 290w                |             |        |        |
| $E_{1u}$ | bend<br>(CpCoCp)     | 179ms, 172 sh<br>(ATR) |              | 179, 175 (ATR) |        |                     |             |        | 155    |
| ?        | ?                    | 68 (ATR)               |              |                |        |                     |             |        |        |
| ?        | ?                    | 57 (ATR)               |              | 57 (ATR)       |        |                     |             |        |        |
| ?        | ?                    |                        |              |                | 97     |                     |             |        |        |
| ?        | ?                    |                        |              |                | 61     |                     |             |        |        |

|   |   |  |  |              |  |  |  |  |  |
|---|---|--|--|--------------|--|--|--|--|--|
| ? | ? |  |  | 78, 66 (ATR) |  |  |  |  |  |
|---|---|--|--|--------------|--|--|--|--|--|

b) 2185 s R 2165 m R 2158 m ir (v(CN)) 566 m ir 501 m ir 456 m ir 433 s br ir 444 vw R ((v(Co-CN) e def. (Co-C-N))

Table 2SI

Frequency data and assignment of the vibrational modes of other [Cp<sub>2</sub>Co][X] complexes, according to Ref. 11

|                 |       | (4) [Cp <sub>2</sub> Co][I] |         | (5) [Cp <sub>2</sub> Co][I <sub>3</sub> ] |         | (7) [Cp <sub>2</sub> Co][Co(CO) <sub>4</sub> ] <sup>a</sup> |                    | (8) [Cp <sub>2</sub> Co][Br <sub>3</sub> ] <sup>b</sup> |         | (9) [Cp <sub>2</sub> Co][FeI <sub>4</sub> ] <sup>c</sup> |         | (10) [Cp <sub>2</sub> Co][HCl <sub>2</sub> ] |                  |
|-----------------|-------|-----------------------------|---------|-------------------------------------------|---------|-------------------------------------------------------------|--------------------|---------------------------------------------------------|---------|----------------------------------------------------------|---------|----------------------------------------------|------------------|
|                 |       | Ir <sup>a</sup>             | Raman   | Ir <sup>a</sup>                           | Raman   | Ir <sup>a</sup>                                             | Raman              | Ir <sup>a</sup>                                         | Raman   | Ir                                                       | Raman   | Ir                                           | Raman            |
| A <sub>1g</sub> | ν(CH) |                             | 3096 mw |                                           | 3102 w  |                                                             | 3129 mw            |                                                         | 3109mw  |                                                          | 3107 mw |                                              | 3113 mw          |
| A <sub>2u</sub> | ν(CH) | 3083 sh                     |         | 3092 s                                    |         | 3128 w                                                      |                    | 3097w                                                   |         | 3095 mw                                                  |         | 3095 s                                       |                  |
| E <sub>1g</sub> | ν(CH) |                             | 3060 mw |                                           | 3085 vw |                                                             | 3112 w             |                                                         | 3091 mw |                                                          | 3090 w  |                                              | 3087 vw<br>sh    |
| E <sub>1u</sub> | ν(CH) | 3054 s                      |         | 3092                                      |         | 3120 mw                                                     |                    | 3097 w                                                  |         | 3095 mw                                                  |         | 3095 s                                       |                  |
| E <sub>2g</sub> | ν(CH) |                             |         |                                           |         |                                                             | 3120 w             |                                                         |         |                                                          | 3097 w  |                                              | 3092 vw<br>sh    |
| E <sub>1g</sub> | ν(CC) |                             | 1419 w  |                                           | 1416 vw |                                                             | 1422 m             |                                                         | 1416 m  |                                                          | 1413 vw |                                              | 1420 w           |
| E <sub>1u</sub> | ν(CC) | 1410 s                      |         | 1408 s                                    |         | 1417 s                                                      |                    | 1410 s                                                  |         | 1408 vs                                                  |         | 1413 vs                                      |                  |
| E <sub>2g</sub> | ν(CC) |                             | 1362 vw | 1353<br>mw br                             | 1362 vw | 1348 w                                                      | ca 1358 w br       |                                                         | 1353 w  |                                                          | 1364 vw |                                              | 1365 vw          |
| A <sub>2u</sub> | ν(CC) | 1114 s                      |         | 1113<br>mw                                |         | 1115 w                                                      |                    | 1111 w                                                  |         | 1111 w                                                   |         | 1113 m                                       |                  |
| A <sub>1g</sub> | ν(CC) |                             | 1109 s  |                                           | 1108 w  |                                                             | 1111 s             |                                                         | 1108 s  |                                                          | 1111 m  |                                              | 1110 s           |
| E <sub>2g</sub> | δ(CH) |                             | 1052 w  |                                           | 1063 vw |                                                             | 1065 m             |                                                         | 1069 m  |                                                          | 1061 m  |                                              | 1077 w<br>1070 w |
| E <sub>2u</sub> | δ(CH) | 1062 m                      |         | 1056<br>w                                 |         | 1062 mw                                                     |                    | 1054 w                                                  |         | 1059 w<br>1046 w                                         |         |                                              |                  |
| E <sub>1u</sub> | δ(CH) | 1002 s                      |         | 1005 s                                    |         | 1014 m<br>1010 m                                            |                    | 1007 ms                                                 |         | 1004 vs                                                  |         | 1008 w                                       |                  |
| E <sub>1g</sub> | δ(CH) |                             | 1004 mw |                                           | 1006 vw |                                                             | 1015 mw<br>1010 mw |                                                         | 1008 w  |                                                          | 1006 vw |                                              | 1007 vw          |
| E <sub>2g</sub> | γ(CH) |                             | 953 vw  |                                           | 939 vw  |                                                             |                    | 945 w                                                   | 947 w   |                                                          | 938 vw  |                                              |                  |

|                       |                      |        |        |        |        |         |        |        |        |                |                 |                 |                  |
|-----------------------|----------------------|--------|--------|--------|--------|---------|--------|--------|--------|----------------|-----------------|-----------------|------------------|
| <b>E<sub>1u</sub></b> | $\gamma(\text{CH})$  | 855 s  |        | 858 m  |        | 896 w   |        | 893 m  |        | 884 m          |                 | 899 vw          |                  |
| <b>A<sub>2u</sub></b> | $\gamma(\text{CH})$  | 818 ms |        | 823 mw |        | 861 s   |        | 862 s  |        | 853 w<br>845 w |                 | 863 s<br>853 s  |                  |
| <b>E<sub>1g</sub></b> | $\gamma(\text{CH})$  |        | 872 w  |        | 864 vw |         |        |        | 854 w  |                | 888 m           |                 |                  |
| <b>A<sub>1g</sub></b> | $\gamma(\text{CH})$  |        | 852 w  |        | 849 vw | 834 m ? | 849 w  |        | 849 w  |                | 862 m<br>848 m  |                 | 854 vw<br>849 vw |
| <b>E<sub>1u</sub></b> | tilt (CpCoCp)        | 499 s  |        | 502 mw |        |         |        | 503 ms |        | 502 mw         |                 | 501 m<br>497 sh |                  |
| <b>A<sub>2u</sub></b> | $\nu(\text{CpCoCp})$ | 458 vs |        | 461 vs |        |         |        | 464 ms |        | 467 vs         |                 | 465 s<br>461 s  |                  |
| <b>E<sub>1g</sub></b> | tilt (CpCoCp)        |        | 394 m  |        | 396 w  |         |        |        | 401 m  |                | 391 sh<br>382 m |                 | 392 mw<br>384 mw |
| <b>A<sub>1g</sub></b> | $\nu(\text{CpCoCp})$ |        | 326 vs |        | 325 s  |         | 320 vs |        | 329 vs |                | 327 vs          |                 | 319 vs           |

a) 2002 mw, 1898 vs br, 1879 vs br, 1863 vs br, 1846 m (Ir); 2000 ms, 1914 s, 1878 s, 1870 s (Raman)  $\nu(\text{C-O})$ ; 557 s sh, 554 s, 502 m, 455 ms (Ir); 522 mw, 436 s, 398 m, 386 s (Raman):  $\nu(\text{Co-CO})$ ; def. (Co-C-O)

b) 203 m, 159 vs (Raman):  $\nu(\text{Br-Br})$

c) 158 vs (Raman),  $\nu(\text{Fe-I})$ ; 107 vs (Raman), def. (I-Fe-I)

Table 3 SI

Frequency data and assignment of the vibrational modes of the octahedral  $[\text{EF}_6]^-$  anions.

|                       |             | <b>KPF<sub>6</sub></b>       |              | <b>KAsF<sub>6</sub></b> |              | <b>NaSbF<sub>6</sub></b>           |              |
|-----------------------|-------------|------------------------------|--------------|-------------------------|--------------|------------------------------------|--------------|
|                       |             | <b>ATR</b>                   | <b>Raman</b> | <b>ATR</b>              | <b>Raman</b> | <b>ATR</b>                         | <b>Raman</b> |
| <b>A<sub>1g</sub></b> | <b>νE-F</b> |                              | 752          |                         | 691          |                                    | 673          |
| <b>T<sub>1u</sub></b> | <b>νE-F</b> | 801<br>835 (nj)              |              | 707 (KBr)<br>680 (ATR)  |              | 665 (KBr)<br>666 (ATR)<br>674 (nj) |              |
| <b>E<sub>g</sub></b>  | <b>νE-F</b> |                              | 580          |                         | 579          |                                    | 581          |
| <b>T<sub>2g</sub></b> | <b>δE-F</b> |                              | 478          | 389 (KBr)<br>372        | 375          | 281                                | 283          |
| <b>T<sub>1u</sub></b> | <b>δE-F</b> | 550<br>555 (ATR)<br>560 (nj) |              | 414 (KBr)<br>422        |              | 160                                |              |
| <b>T<sub>2g</sub></b> | <b>δE-F</b> |                              |              |                         |              |                                    |              |

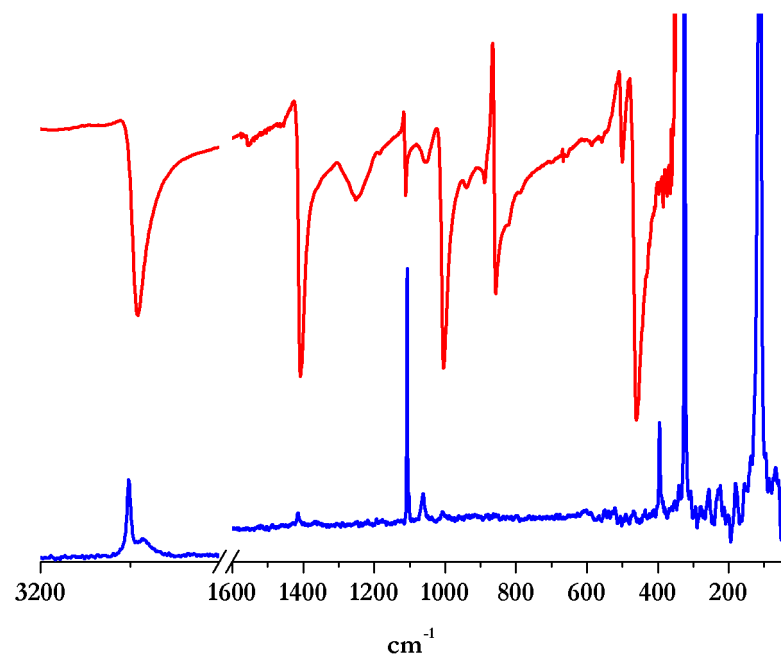

Figure 1 SI. Infrared (ATR, top) and Raman (crystal, bottom) spectra of the complex **5**.

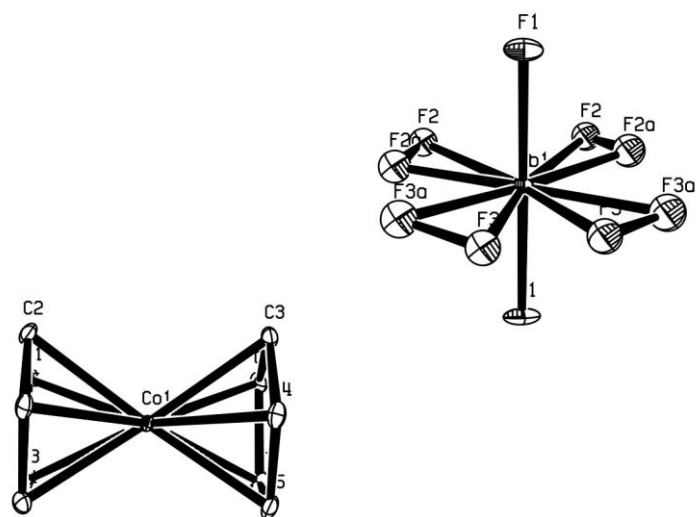

Figure 2 SI. Arrangement of ions in complex 3. Disordered fluorine atoms are highlighted.



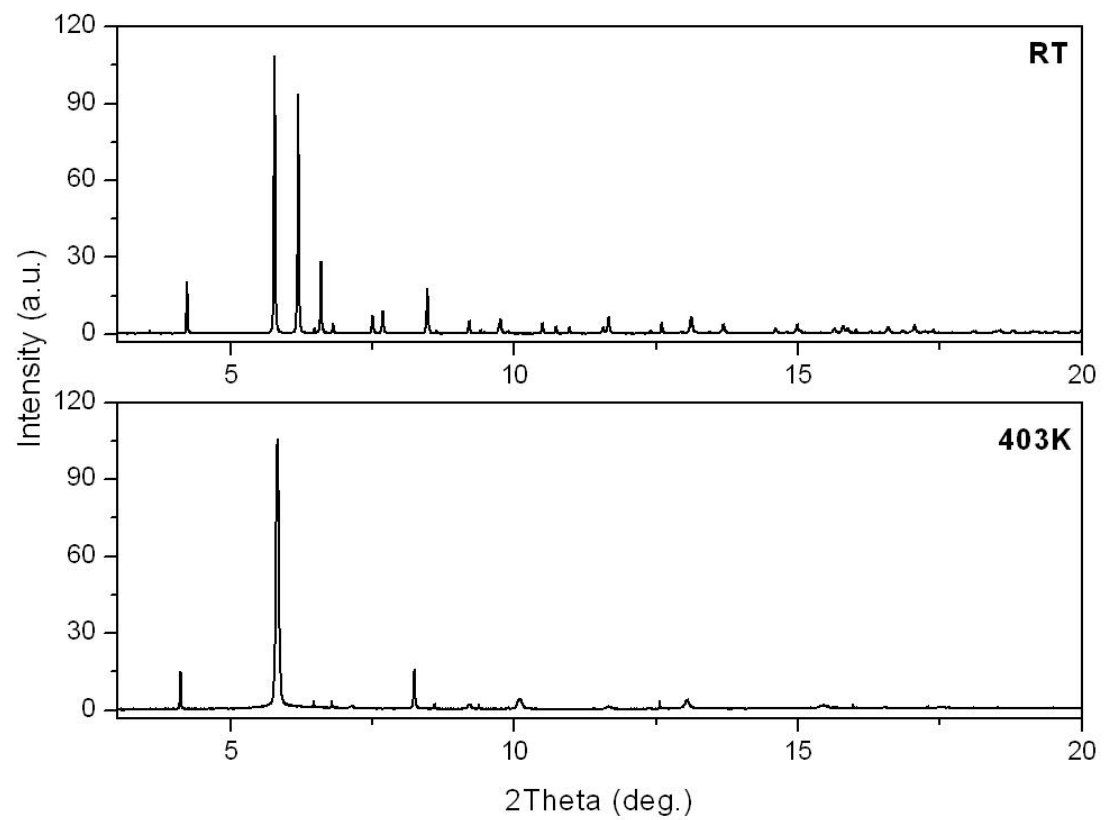

Figure 3 SI. XRPD patterns of the complex **3** at RT and 403K

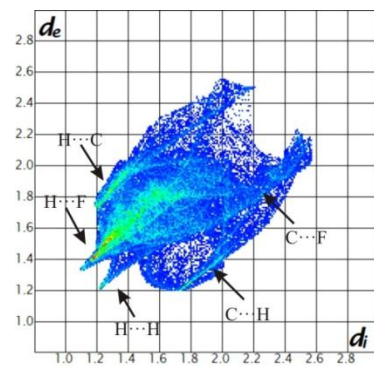

(1a)

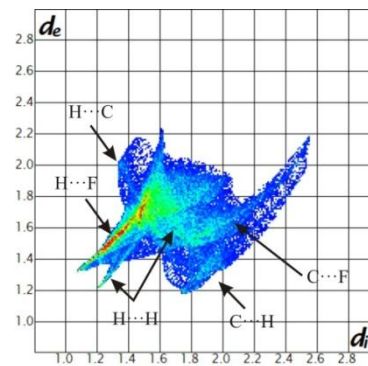

(1b)

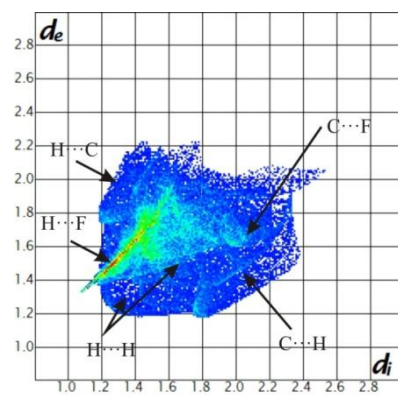

(2)

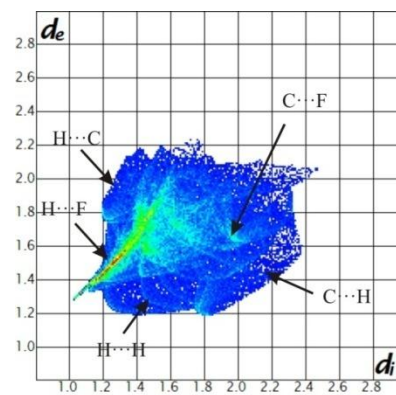

(3)

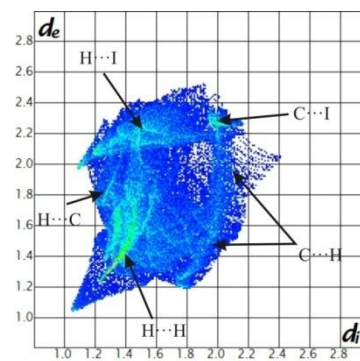

(4)

Figure 4 SI. (HS fingerprint plots of the  $[\text{Cp}_2\text{Co}^+]$  moiety in compounds **1**, **2**, **3** and **4**. Arrows indicate regions with a predominant contribution from atom pairs involved in intermolecular interactions since only pairs of ( $d_i$ ,  $d_e$ ) distances are reported irrespectively of type of atoms involved.)

Figure 4SI shows the HS fingerprint plots of the cobaltocenium ions in compounds **1**, **2**, **3** and **4** while the different contact percentages are reported in Table 4SI. The plots are built by considering the contacts formed by one  $\text{Cp}_2\text{Co}$  unit with the first shell atoms only.

Table 4SI. (Percentage values of contacts formed by the atoms of a  $[\text{Cp}_2\text{Co}^+]$  moiety with surrounding atoms in compounds **1**, **2**, **3** and **4**.)

|       | <b>1a</b> | <b>1b</b> | <b>2</b> | <b>3</b> | <b>4</b> |
|-------|-----------|-----------|----------|----------|----------|
| C···H | 10.2      | 8.2       | 8.2      | 7.9      | 11.8     |
| H···H | 25.2      | 37.8      | 35.6     | 34.6     | 64.9     |
| H···C | 13.1      | 0.7       | 5.1      | 4.7      | 5.5      |
| H···X | 48.7      | 48.9      | 46.2     | 47.4     | 15.7     |
| C···X | 2.8       | 4.5       | 4.9      | 5.4      | 2.1      |

As compound **1** has two independent cobaltocenium molecules (**1a** and **1b**) in the unit cell, two corresponding 2D histograms are reported. The fingerprint plot **1a** is rather symmetric along the diagonal (where  $d_i=d_e$ ) indicating the same occurrence of ( $d_i$ ,  $d_e$ ) and ( $d_e$ ,  $d_i$ ) couples (in this case of H···H and C···H contacts, see table 4SI). This reveals the close packing of the molecules in the crystal.<sup>17</sup> The spikes in the bottom-left part indicate that H···F and H···H are the shortest contacts. For the H···F contacts  $d_e > d_i$  suggesting the donor nature of the C-H bond involved in HBs with the fluorine. The **1b** 2D plot shows an interesting difference with respect to **1a**: it is not symmetric and presents a predominance of H···H and H···F contacts. This difference indicates that **1b** molecules mainly interact with **1a**.

Compounds **2** and **3** show very similar 2D fingerprint plots which differ from that of **1**. It is relevant that both compounds have only one  $[\text{Cp}_2\text{Co}^+]$  moiety in the unit cell and similar trigonal space group, whereas complex **1** has a monoclinic P21/c space group. As for **1a**, the lack of symmetry with respect the diagonal  $d_i=d_e$  is due to the different number of C···H and H···C contacts.

The 2D fingerprint plot of complex **4** is clearly different: the histogram is largely dominated by H···H interactions, whereas the number of H···I contacts is one third of the number of H···F in complexes **1**, **2** and **3**.
